# Supplementary material
Source: PubMed Central journal article supplement (PMC10134073)
Supplement: NIHMS1888111-supplement-Supplement.pdf [file NIHMS1888111-supplement-Supplement.pdf]

Figure S1. Related to Figure 1

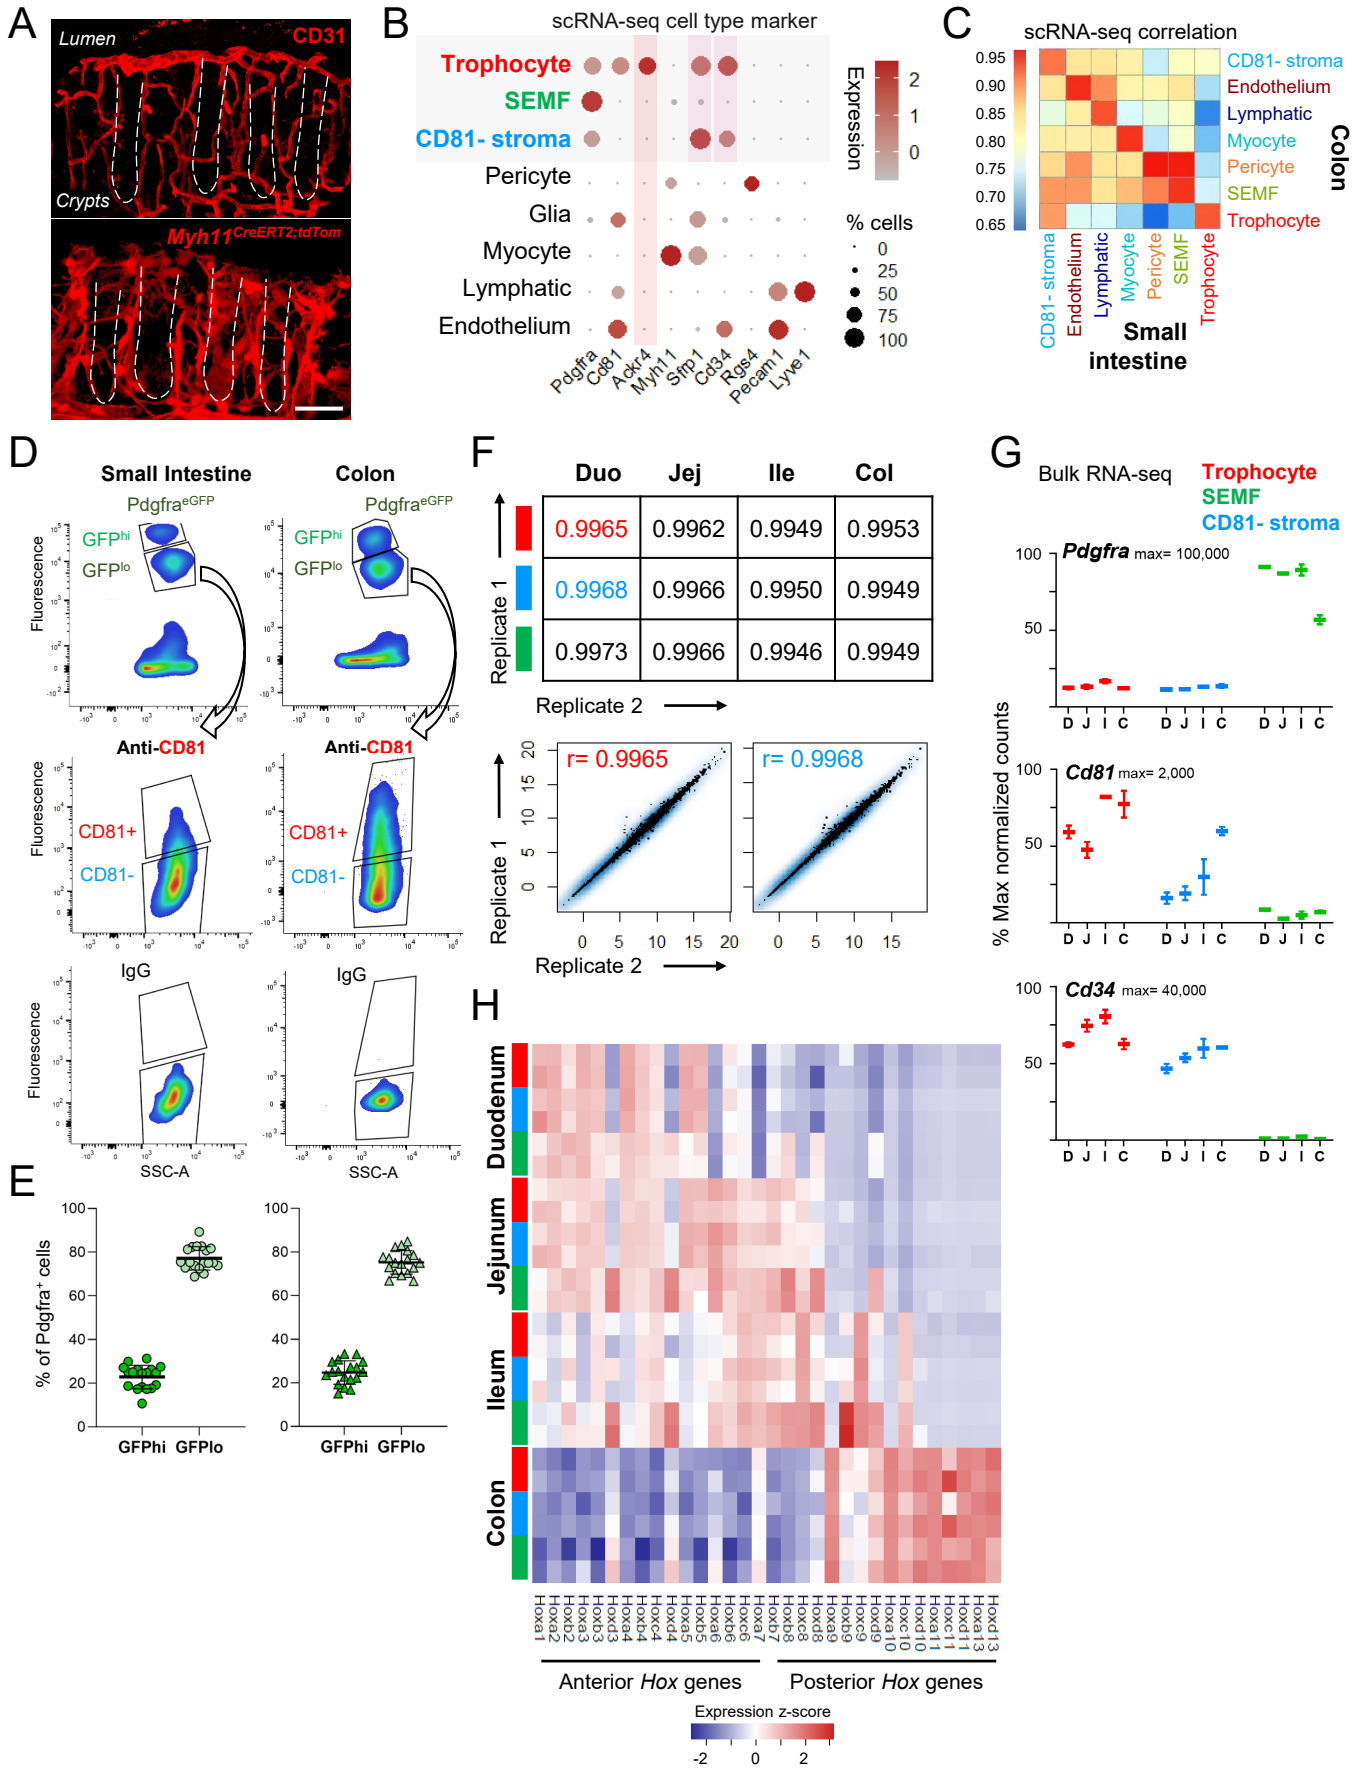

**Figure S1. Mesenchymal cell components and marker genes.** Related to Figure 1.

- A) Top: Cross-section of endothelial cell marker CD31 staining (red) in colon crypt whole-mounts. z-stack 56  $\mu\text{m}$ . Bottom: Cross-section of *Myh11<sup>Cre(ERT2);tdTom</sup>* mice (tdTOM) colonic whole-mount 5 days after tamoxifen injection to label myocytes red. Scale bar 50  $\mu\text{m}$ . For orientation, crypts are demarcated with dashed lines.
- B) scRNAseq -based expression of selected marker genes that identify cell types in small intestine SI [S1] and colonic (this study) mesenchyme (combined data). *Ackr4* is specific to trophocytes among all mesenchymal cells.
- C) Correlation of global scRNA-seq profiles for each SI and colonic cell population (see also Figure 1E). Color scale: Pearson correlation coefficient.
- D) Representative FACS plots illustrating the gating strategy to purify Pdgfra<sup>eGFP</sup> high and low cells and sub-gating of CD81<sup>+</sup> or CD81<sup>-</sup> fractions among Pdgfra<sup>eGFP</sup> low cells in SI (left) and colon (right). Gating with isotype IgG was used as a control in each experiment.
- E) Percentages of Pdgfra<sup>eGFP</sup> -high and -low cells captured by flow cytometry, expressed relative to all Pdgfra<sup>+</sup> cells (100%). Lines indicate mean  $\pm$ SD; each datapoint is from an independent experiment (n=18).
- F) Pearson correlation values from bulk RNA-seq analysis of replicate samples based on all expressed genes (rlog-transformed read counts). Duo, duodenum; Jej, jejunum; Ile, ileum; Col, colon. Color blocks indicate cell type: red, trophocytes; blue, CD81<sup>-</sup> stromal cells; green, SEMFs. Bottom: Representative correlation plots between replicates from duodenal trophocytes (left) and CD81<sup>-</sup> stromal cells (right).
- G) Expression (normalized counts from bulk RNA-seq) of selected marker genes in FACS-purified cells from different intestinal regions. n=2 mice for each cell isolation. Whiskers: minimum to maximum values.
- H) Expression heatmap of *Hox* genes (row z-scores) in FACS-purified cells from different intestinal segments. Each row represents a sample, color blocks indicate cell types: red, trophocytes; blue, CD81<sup>-</sup> stromal cells; green, SEMF.

Figure S2. Related to Figures 1 and 2

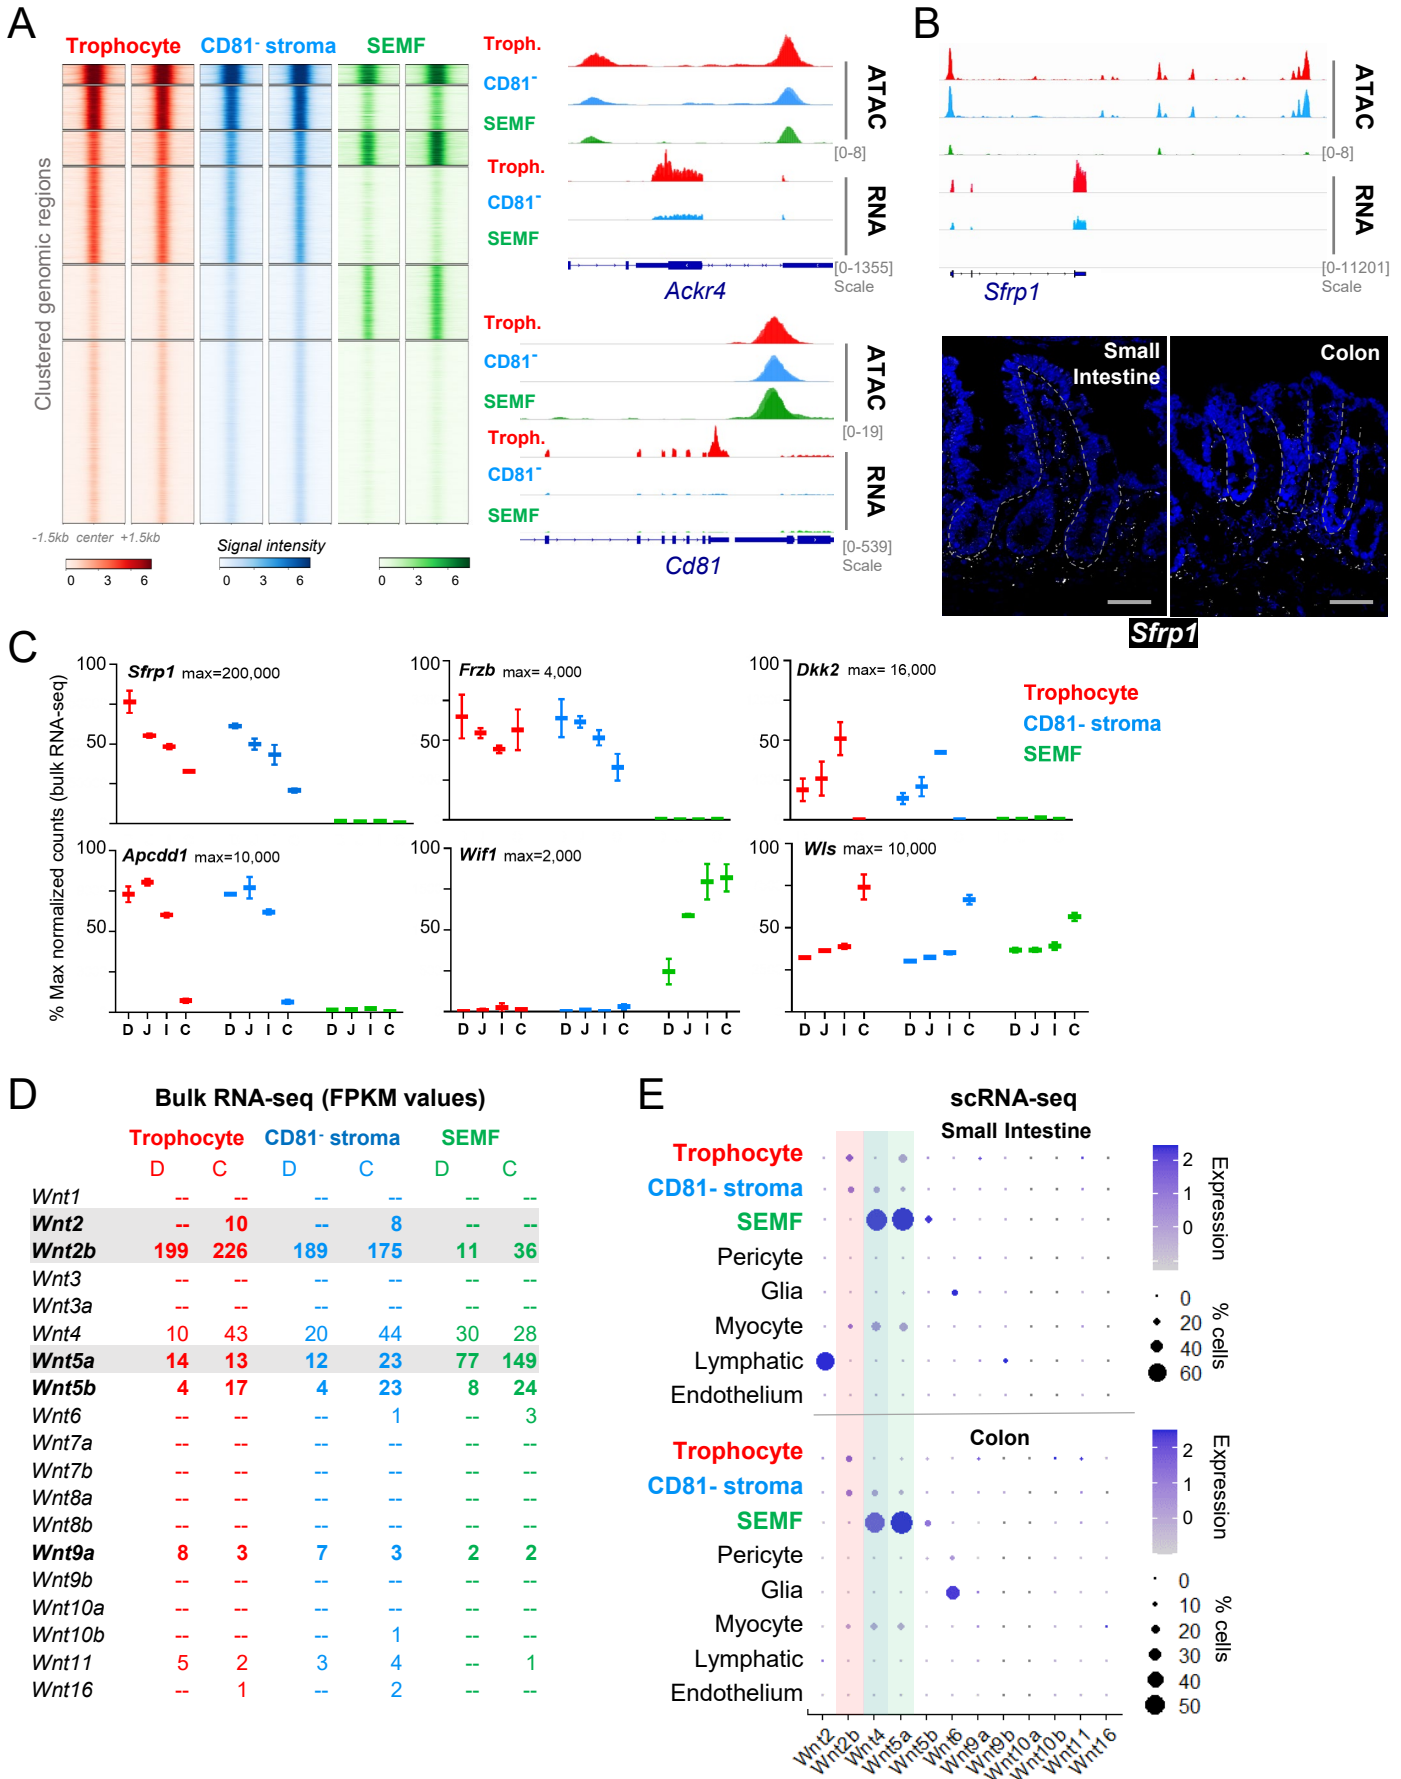

**Figure S2. Chromatin profiles and expression of Wnt pathway genes in mesenchymal cell types.** Related to Figures 1 and 2.

- A) K-means clustering ( $k=6$ ) of ATAC signal intensity at accessible enhancers, sorted by signal strength in duplicate samples per group. Trophocyte and CD81<sup>+</sup> stromal landscapes are highly similar. Right, Integrated Genome Viewer (IGV) tracks plot ATAC- and RNA-seq reads (the relative y-axis scales are indicated) for trophocyte-restricted marker genes *Ackr4* and *Cd81* (8-kb regions are shown) in each PDGFRA<sup>+</sup> cell type.
- B) Top, ATAC-seq and RNA-seq reads of accessible chromatin as IGV-sample tracks (duplicate overlay) at the *Sfrp1* locus, which is expressed in Pdgfra<sup>lo</sup> cells but not in SEMF. A 110-kb genomic region is shown and relative scales are indicated. Bottom, in situ hybridization (RNAscope) for *Sfrp1* (white) in SI and colonic tissue sections. Nuclei in blue (DAPI). Epithelium is outlined with dashed lines. Scale bars 50  $\mu$ m.
- C) Bulk RNA-seq expression of Wnt-pathway genes across PDGFRA<sup>+</sup> cell types and intestinal segments: duodenum (D), jejunum (J), ileum (I), and colon (C). Segmental expression is shown for selected negative Wnt regulators (top row) and ancillary pathway components (bottom). Y-axes: percent of maximum normalized counts for each gene.  $n=2$  biological replicates per cell type and per segment. Box: 25<sup>th</sup> to 75<sup>th</sup> percentile, whiskers: minimum to maximum values.
- D) Wnt ligand expression (mean fragments per kb per million mapped fragments (FPKM) from 2 biological replicates) in bulk PDGFRA<sup>+</sup> cell types from wild-type mouse duodenum (D) and colon (C). Dashes: FPKM <1.
- E) Expression of Wnt ligands across all mesenchymal cell types in scRNA-seq data from SI (top) [S1] and colon (bottom). Cells were identified by known marker genes (Figure S1B). Color scale: mRNA level (normalized counts), circle size: fraction of cells in each population expressing the gene. Only the Wnt genes shown were detected in any cell type.

Figure S3. Related to Figure 2

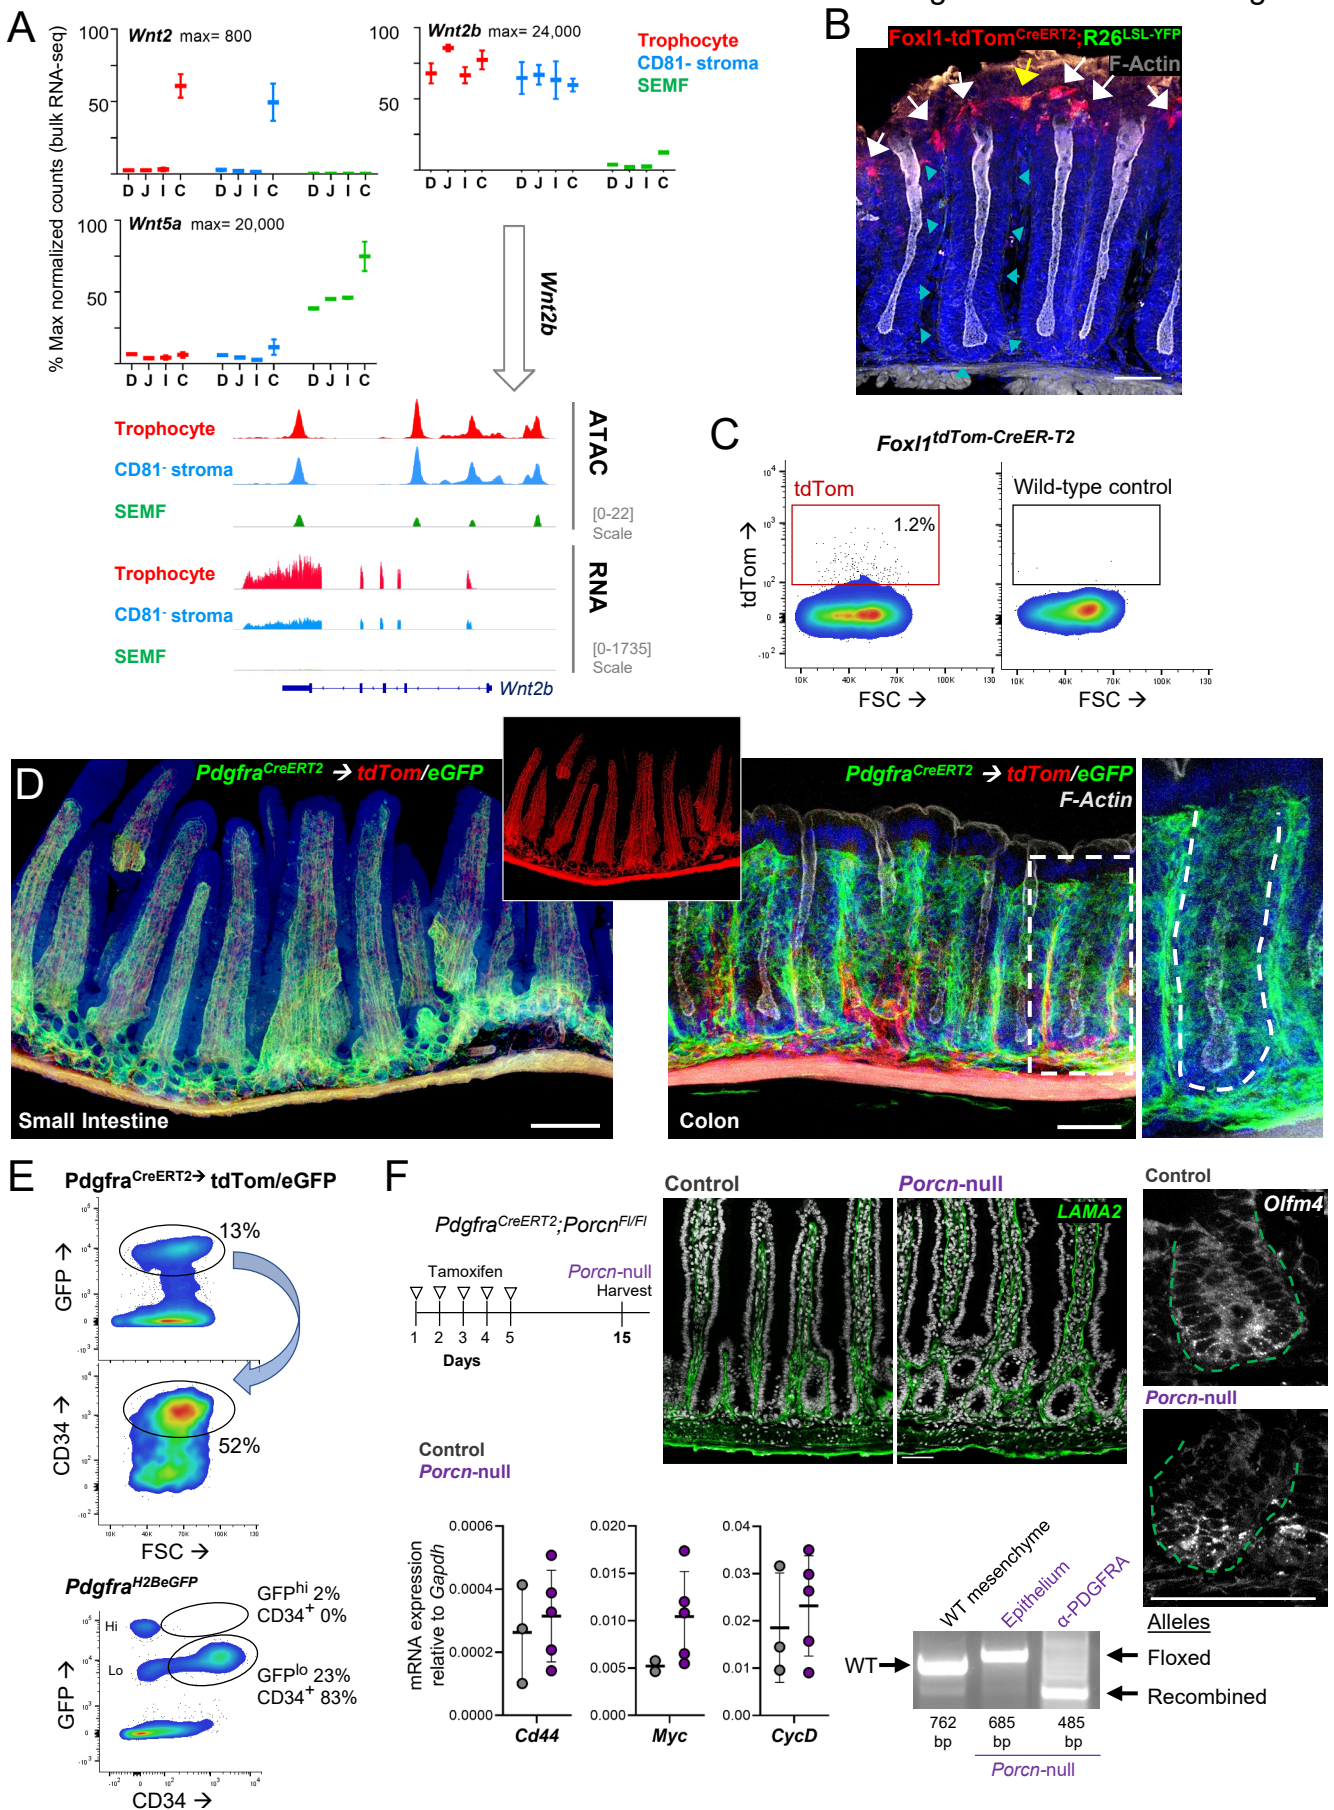

**Figure S3. *Wnt* gene expression and loss of *Wnt* secretion in PDGFRA<sup>+</sup> intestinal mesenchyme.** Related to Figure 2.

- A) Top, expression of selected *Wnt* agonists in mesenchymal cell types across the intestinal length (bulk RNA-seq normalized counts represented as % of indicated maxima, n=2 per group). Bottom, IGV tracks of ATAC-seq (upper tracks) and RNA-seq (lower tracks) reads from SI cell types at the *Wnt2b* locus. A 30-kb genomic region is shown. Y-axis scales are indicated.
- B) Whole-mount image of colonic tissue from *Foxl1<sup>tdTom-CreERT2</sup>* (red) mice crossed with *Rosa26<sup>+YFP</sup>* (green) mice, treated with 5 daily injections of tamoxifen and counterstained for F-Actin (phalloidin, light grey) and nuclei (DAPI, blue). Overlay of 10  $\mu$ m z-stacks. White arrows point to Tom<sup>+</sup> cells, yellow arrows to recombined Tom<sup>+</sup>YFP<sup>+</sup> cells, and light blue arrows to SEMFs lacking either label. The epithelial luminal surface displays autofluorescence from the required high excitation intensity. Scale bar 50  $\mu$ m. The image is representative of n=3 biological replicates.
- C) Flow cytometry plots (smoothened scatter plots with pseudo-colored density) for tdTom<sup>+</sup> cells in *Foxl1<sup>tdTom-CreERT2</sup>* (left) and wild-type (right) isolated mesenchyme. Average percentage of gated live single cells from n=3 biological replicates each. FSC, forward scatter area.
- D) Whole-mount fluorescence images from *Pdgfra<sup>CreERT2</sup>;Rosa26<sup>mT/mG</sup>* SI (left) and colon (right), where Cre activity converts ubiquitous tdTom (red) to eGFP (green) signal. Counter-stain: F-Actin (Phalloidin, grey), and nuclei (DAPI, blue). Middle inset: tdTom channel only from an SI sample. Right: Enlarged area showing eGFP signal, with crypt epithelium outlined (dashed line). Scale bars: SI 200  $\mu$ m, colon 50  $\mu$ m.
- E) eGFP signal intensity (smoothened FACS scatter plots with pseudo-colored density) in SI mesenchyme isolated from *Pdgfra<sup>CreERT2</sup>;Rosa26<sup>mT/mG</sup>* mice. Top: 13.5% of live single cells are GFP<sup>+</sup>. Middle (sub-gating for CD34 Ab staining): 52% of GFP<sup>+</sup> cells express CD34. Bottom (eGFP and CD34 signal intensity in *Pdgfra<sup>H2BeGFP</sup>* mice): Among all live mesenchymal cells, 83% of GFP<sup>lo</sup> cells and no GFP<sup>hi</sup> cells express CD34, confirming bulk RNA-seq data (Figure S1G). Shown are representative plots and percentages averaged from n=3 replicates. FSC, forward scatter area.
- F) Top, experimental design for *Pdgfra<sup>CreERT2</sup>;Porcn<sup>fl/fl</sup>* mice and immunofluorescence for laminin (LAMA2, green) and nuclei (DAPI, grey) in SI tissue sections from control and *Porcn*-null animals. Right, *Olfm4* in-situ hybridization (RNAscope, white) signals in single crypts (dashed outline) representing n=4 (control) and n=6 (*Porcn*-null) mice. Scale bars 50  $\mu$ m. Bottom left, mRNA levels of ISC-associated genes measured by qRT-PCR in crypts isolated from control (grey) and *Porcn*-null (purple) SI. Results are normalized to *Gapdh* levels. Bottom right, *Porcn* gene disruption confirmed by genotyping PCR of FACS-sorted PDGFRA Ab-stained cells from wild-type (WT) or *Porcn*-null mesenchyme. Unrelated sample lanes were cropped. The expected sizes of PCR products are indicated below each lane of the agarose gel.

Figure S4. Related to Figure 2

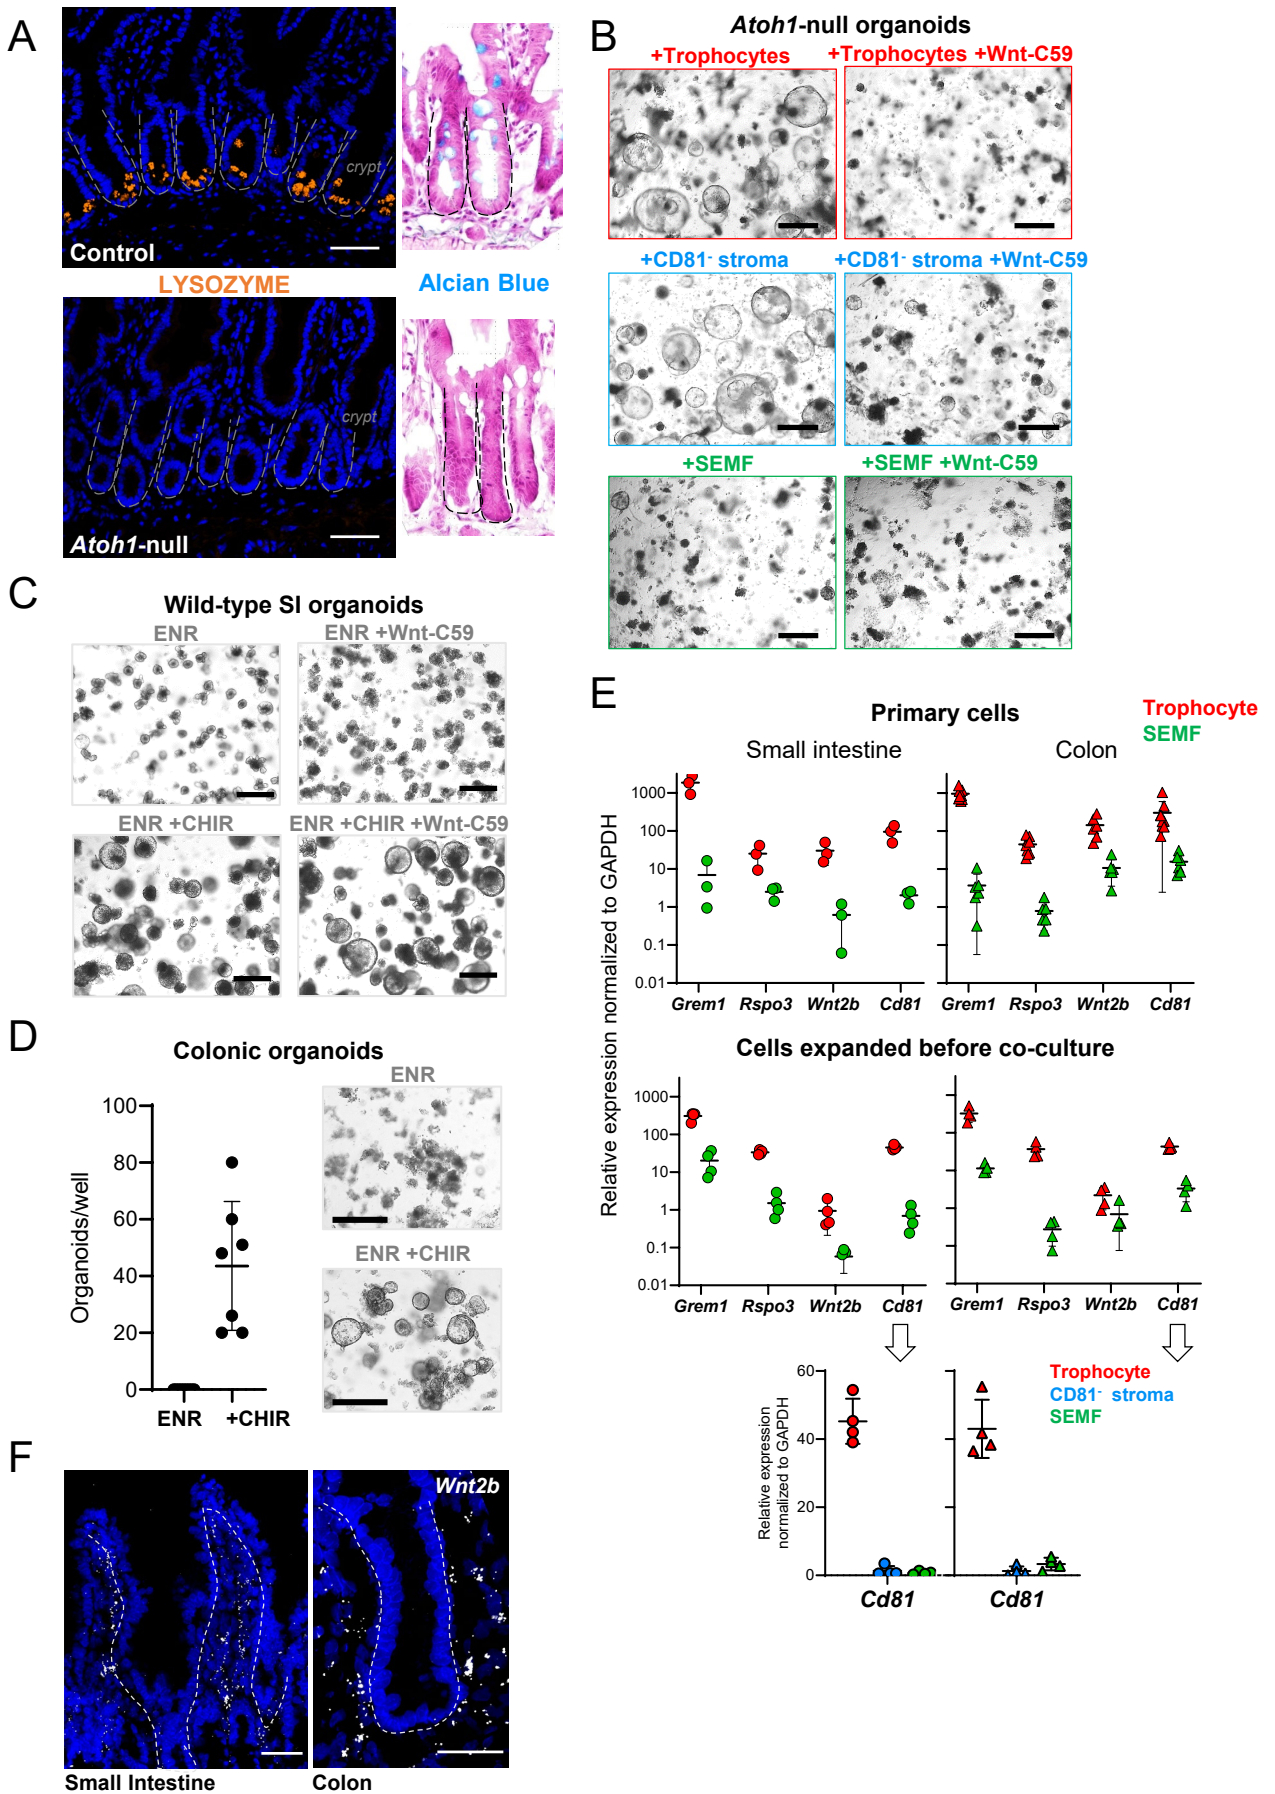

**Figure S4. Wnt dependency of *Atoh1*-null and colonic organoids and retained expression differences of mesenchymal cells *in vitro*.** Related to Figure 2.

- A) Immunofluorescence for Paneth-cell marker Lysozyme (LYZ, orange plus DAPI counterstain, blue) and Alcian Blue staining for mucus-producing secretory cells (blue) in SI from control and *Atoh1*-null (*Vil1<sup>CreERT2</sup>;Atoh1<sup>fl/fl</sup>*) mice 3 weeks after tamoxifen treatment. Dashed lines indicate crypts and scale bars represent 50  $\mu$ m.
- B) Representative organoids derived from *Atoh1*-null SI crypts 4 days after co-culture with different colonic mesenchymal cells in the presence or absence of the Porcupine inhibitor Wnt-C59. Representative wells from n=3 independent experiments are shown. Data are quantified in Figure 2E. Scale bars 200  $\mu$ m.
- C) Organoid growth from wild-type duodenal crypts 4 days after culture in ENR medium with or without CHIR99021 (CHIR) and with or without Porcupine inhibitor Wnt-C59. Representative wells from n=3 independent experiments are shown. Scale bars 200  $\mu$ m
- D) Organoid counts from wild-type colonic crypts grown for 4 days in ENR medium with or without CHIR99021 (CHIR). Representative wells from n=3 independent experiments are shown. Lines indicate Mean  $\pm$ SD. Right, bright-field images of organoids derived under the two culture conditions. Scale bars 200  $\mu$ m.
- E) Top, qRT-PCR analysis of relevant ISC-niche markers in SEMF (green) and trophocytes (red) freshly isolated (upper panel) from SI (circles, left) and colon (triangles, right) or expanded for 3 days in culture as unfractionated mesenchyme before cell sorting by flow cytometry (lower panel). Bottom, *Cd81* expression in SEMF, trophocytes (as above), and CD81<sup>-</sup> stromal cells (blue) after *in vitro* expansion and FACS sorting. Each dot represents an independent experiment, lines are Mean  $\pm$ SD (n= 3-4). Data are normalized to *Gapdh* levels as  $2^{-(\Delta\Delta Ct)} \times 100$ .
- F) RNAscope in situ hybridization for *Wnt2b* (white) in SI (left) and colonic (right) tissue sections counterstained with DAPI (blue). Scale bars 50  $\mu$ m; crypts and villi are outlined by dashed lines.



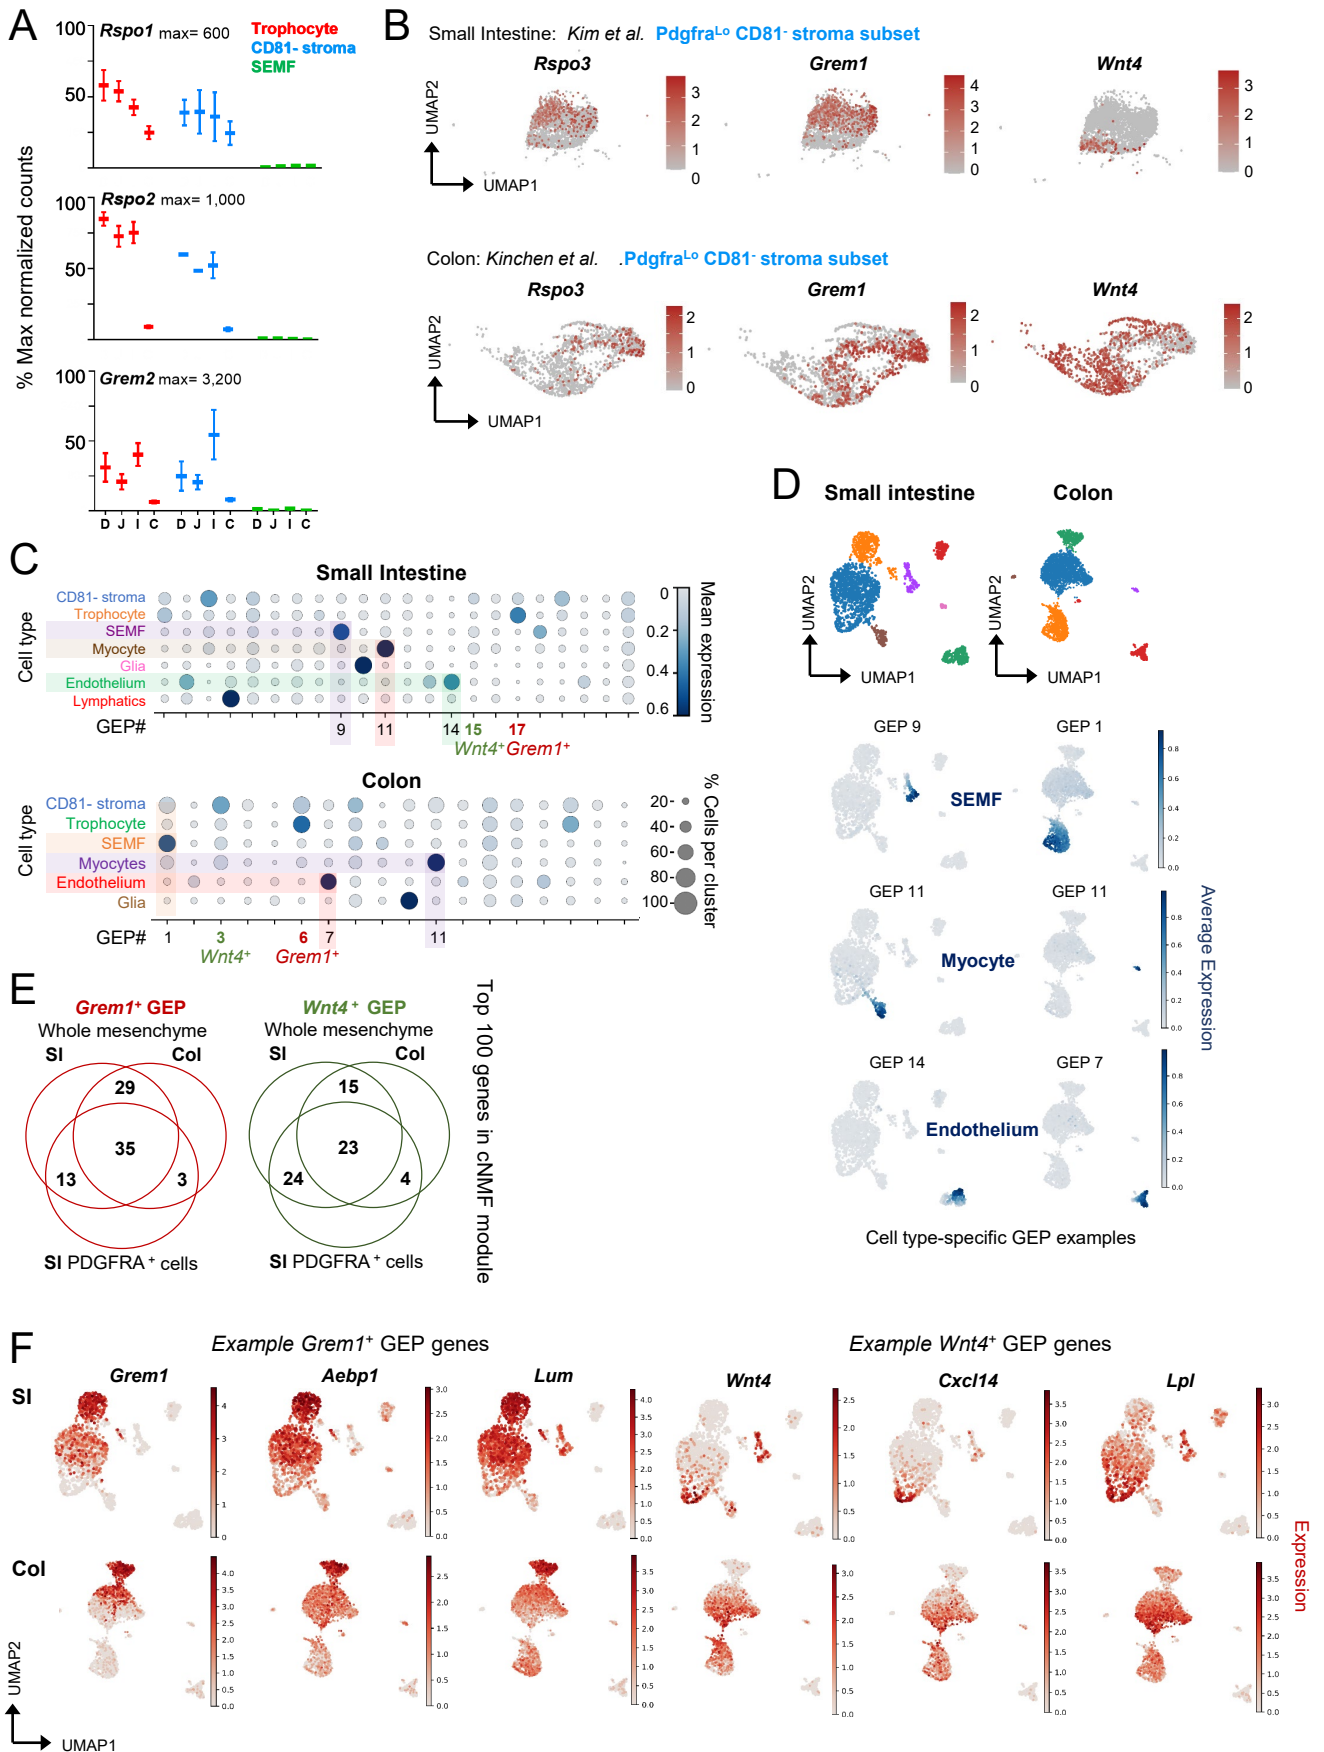

## Figure S5. Expression gradients within and across cell populations.

Related to Figure 3.

- A) Normalized bulk RNA-seq counts for *Rspo1*, *Rspo2* and *Grem2* in purified mesenchymal cell types from mouse duodenum (D), jejunum (J), ileum (I), and colon (C). Data from n=2 mice per group. See also Figure 3B.
- B) Marker gene expression in feature plots of whole mesenchyme scRNA-seq data, retrieved and re-analyzed from published studies as indicated [S2, S3]. For clarity, only the *Pdgfra*<sup>lo</sup> *Cd81*<sup>-</sup> stromal cell cluster is depicted on the UMAP plots.
- C) Percent of cells and average expression of each gene expression program (GEP) derived from cNMF analysis across cell types identified separately by Leiden clustering of scRNA data.
- D) UMAP plot from Leiden clustering of scRNA-seq data from SI [S1] and colonic (this study) mesenchyme. Below, SEMF-, myocyte-, and endothelial cell-specific GEP expression scores from cNMF analysis are projected on these UMAP plots.
- E) Overlap of top 100 genes in *Grem1*<sup>+</sup> or *Wnt4*<sup>+</sup> GEPs across independent datasets: Whole mesenchyme from SI [S1] and colon (see Figure 3E) and sorted PDGFRA<sup>+</sup> cells from SI (see Figure 3F).
- F) UMAP plots showing examples of genes that feature in the *Grem1*<sup>+</sup> and *Wnt4*<sup>+</sup> GEPs depicted in Figure 3E. Distribution of these genes in both the SI (top row) [S1] and colon (bottom row) overlaps but is not identical with *Grem1* or *Wnt4*.

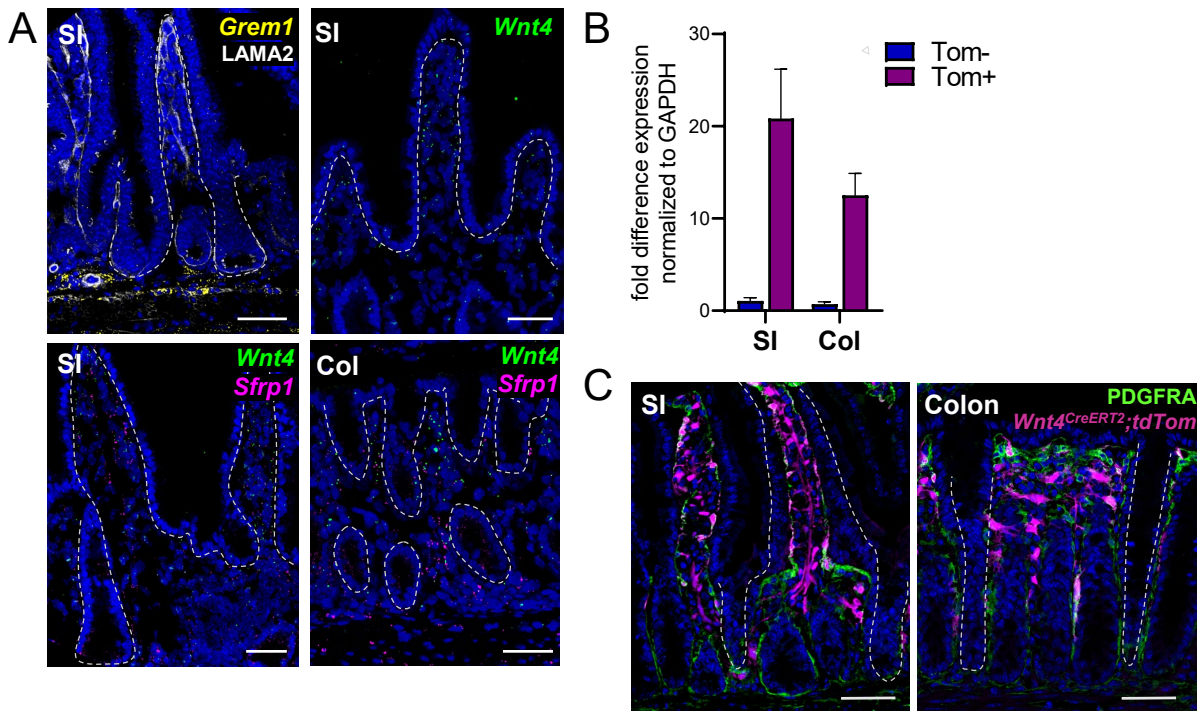

**Figure S6. Distribution of signaling molecules in relation to tissue anatomy.** Related to Figure 4.

- A)** RNAscope in situ hybridization for *Grem1* (yellow), *Wnt4* (green), or *Sfrp1* (magenta) as indicated, counterstained for nuclei (DAPI, blue) in SI and colon. Crypts and villi are outlined with dashed lines. Scale bars 50  $\mu$ m.
- B)** Expression of *Wnt4* in tdTom<sup>+</sup> and tdTom<sup>-</sup> FACS-isolated mesenchymal cells from *Wnt4<sup>CreERT2</sup>;R26R<sup>tdTom</sup>* small intestine (SI) and colon (Col), measured by qRT-PCR. Mean  $\pm$ SD from n=3 animals.
- C)** Tissue sections of *Wnt4<sup>CreERT2</sup>;R26R<sup>tdTom</sup>* SI crypt-villus units and colonic crypts. tdTom signal (magenta) is counterstained with PDGFRA Ab (green, to highlight dense SEMF aggregates) and DAPI (blue). Scale bars 50  $\mu$ m. Dashed lines indicate outline of epithelium.

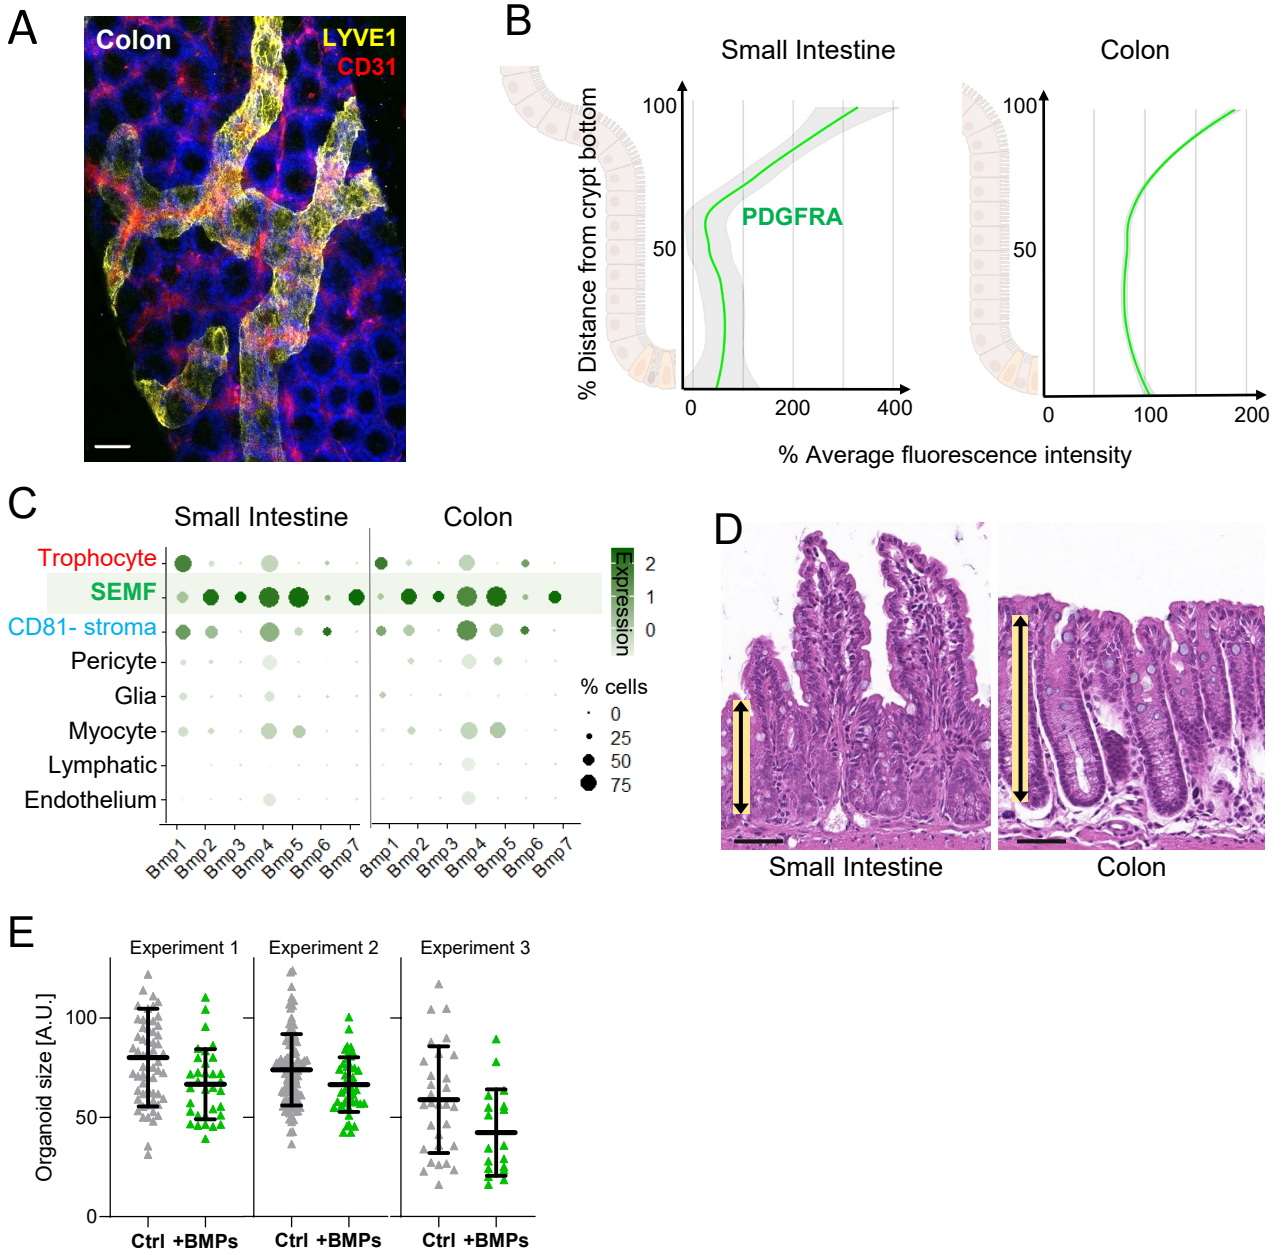

### Figure S7. Distribution of signaling molecules in relation to tissue architecture.

Related to Figures 6 and 7.

- A) Wild-type colonic tissue stained for lymphatic vessel (LYVE1, yellow), endothelial cell (CD31, red) and nuclear (DAPI, blue) markers and photographed from the serosal side. Crypts far from lymphatic vessels outnumber those that lie close. Scale bar 50  $\mu$ m.
- B) Fluorescence intensity of anti-PDGFRA Ab staining in SI and colonic tissue sections, expressed as the percent of average fluorescence intensity from the crypt base upward including the villus base (SI) or the top of the colonic crypt (Col). Smoothened average signals (green) are graphed across n=3 samples, with 95% confidence intervals shaded in grey.
- C) scRNA-seq expression of BMP ligands across SI [S1] and colonic mesenchymal cell types (see Figure 1E for the corresponding UMAP plots).
- D) Hematoxylin and eosin (H&E)-stained section of mouse SI (ileum, left) and colonic (right) tissue to illustrate differences in crypt height (double arrows). Scale bars 50  $\mu$ m.
- E) Individual experiments for data collated in Figure 7E. Organoid size 4 days after SI crypts were co-cultured with PDGFRA<sup>lo</sup> CD81<sup>-</sup> CD55<sup>hi</sup> stromal cells pre-treated for 5 days with rBMP2/4/7 (+BMPs) or untreated (Ctrl, serum-free medium only). Values in arbitrary units (A.U.), each representing one organoid. Lines indicate mean  $\pm$ SD.

### Supplemental References

**[S1]** McCarthy, N., Manieri, E., Storm, E.E., Saadatpour, A., Luoma, A.M., Kapoor, V.N., Madha, S., Gaynor, L.T., Cox, C., Keerthivasan, S., et al. (2020). Distinct Mesenchymal Cell Populations Generate the Essential Intestinal BMP Signaling Gradient. *Cell Stem Cell* 26, 391-402.e5.

10.1016/j.stem.2020.01.008.

**[S2]** Kim, J.E., Fei, L., Yin, W.C., Coquenlorge, S., Rao-Bhatia, A., Zhang, X., Shi, S.S.W., Lee, J.H., Hahn, N.A., Rizvi, W., et al. (2020). Single cell and genetic analyses reveal conserved populations and signaling mechanisms of gastrointestinal stromal niches. *Nat Commun* 11.

**[S3]** Kinchen, J., Chen, H.H., Parikh, K., Antanaviciute, A., Jagielowicz, M., Fawkner-Corbett, D., Ashley, N., Cubitt, L., Mellado-Gomez, E., Attar, M., et al. (2018). Structural Remodeling of the Human Colonic Mesenchyme in Inflammatory Bowel Disease. *Cell* 175, 372-386.e17.
